# Supplementary material for: A non-canonical pathway regulates ER stress signaling and blocks ER stress-induced apoptosis and heart failure
Source: PubMed Central journal article supplement (PMC5527107; doi:10.1038/s41467-017-00171-w), 2017-07-25
Supplement: 41467_2017_171_MOESM1_ESM.pdf [file 41467_2017_171_MOESM1_ESM.pdf]

File Name: Supplementary Information

Description: Supplementary Figures and Supplementary Table.

## Supplementary Figures

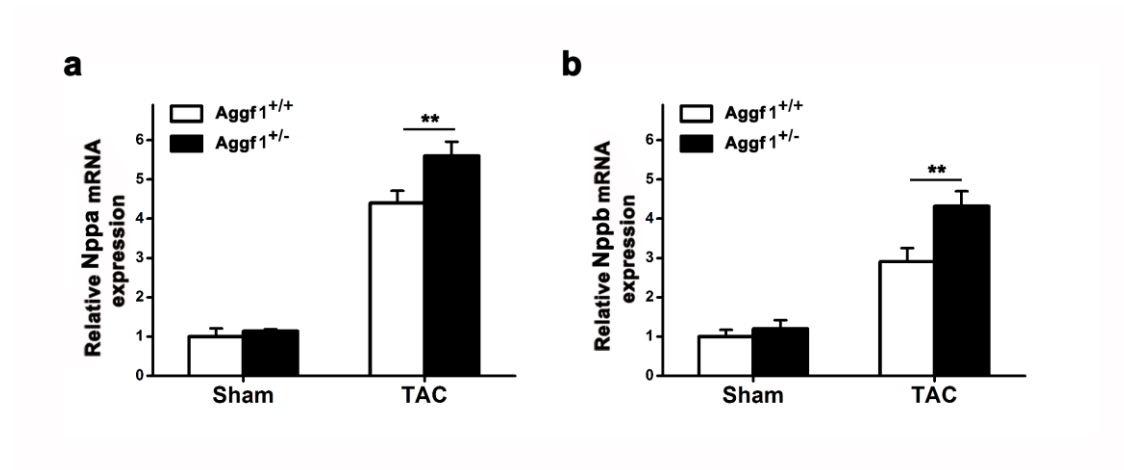

**Supplementary Figure 1. Heterozygous *Aggf1* mice increases the expression levels of *Nppa* and *Nppb* after TAC.**

Real time RT-PCR analysis was performed for *Nppa* encoding ANP (a) and *Nppb* encoding BNP (b) using total RNA samples isolated from *Aggf1*<sup>+/-</sup> mice or wild type *Aggf1*<sup>+/+</sup> mice with TAC or Sham surgeries (n=12/group, \*\**P*<0.01). Data are presented as mean ± s.d. from at least three independent experiments. Statistical analysis was carried out by a Student's two-tailed t-test.

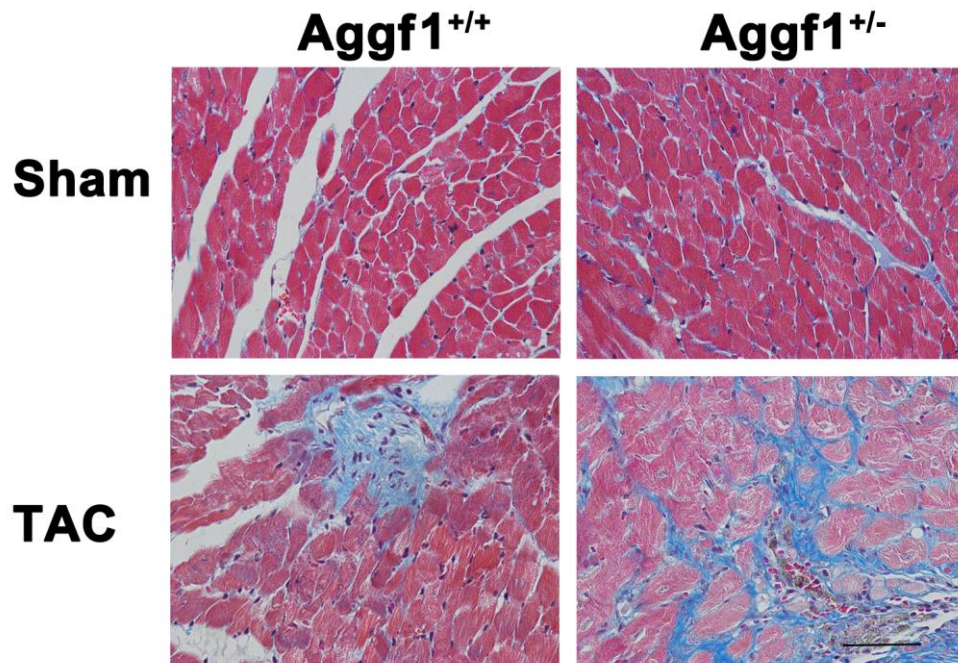

**Supplementary Figure 2** *Aggf1*<sup>+/-</sup> mice showed an enhanced level of myocardial fibrosis induced by TAC with Masson trichrome staining. Scale bar, 50  $\mu$ m.

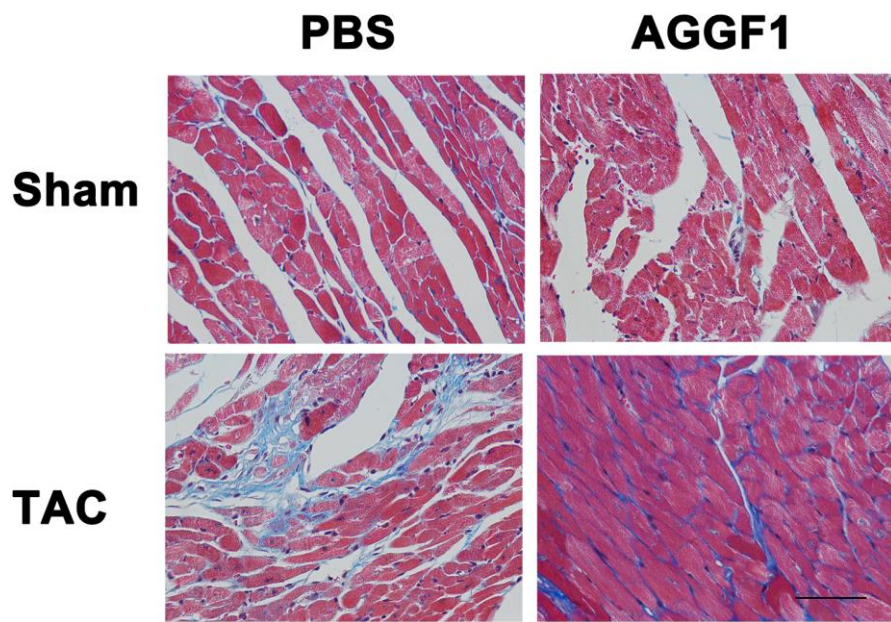

**Supplementary Figure 3 The AGGF1 protein therapy inhibits myocardial fibrosis induced by TAC with Masson trichrome staining. Scale bar, 50  $\mu$ m.**

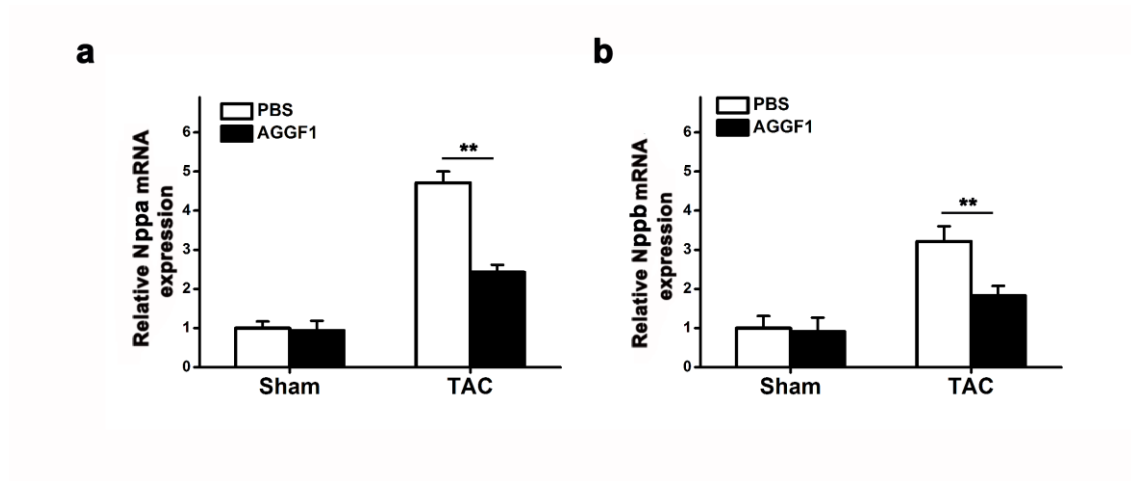

**Supplementary Figure 4** The AGGF1 protein treatment significantly decreased the expression levels of *Nppa* (a) and *Nppb* (b) after TAC. Data are presented as mean  $\pm$  s.d. from at least three independent experiments (n=12/group, \*\* $P$ <0.01). Statistical analysis was carried out by a Student's two-tailed t-test.

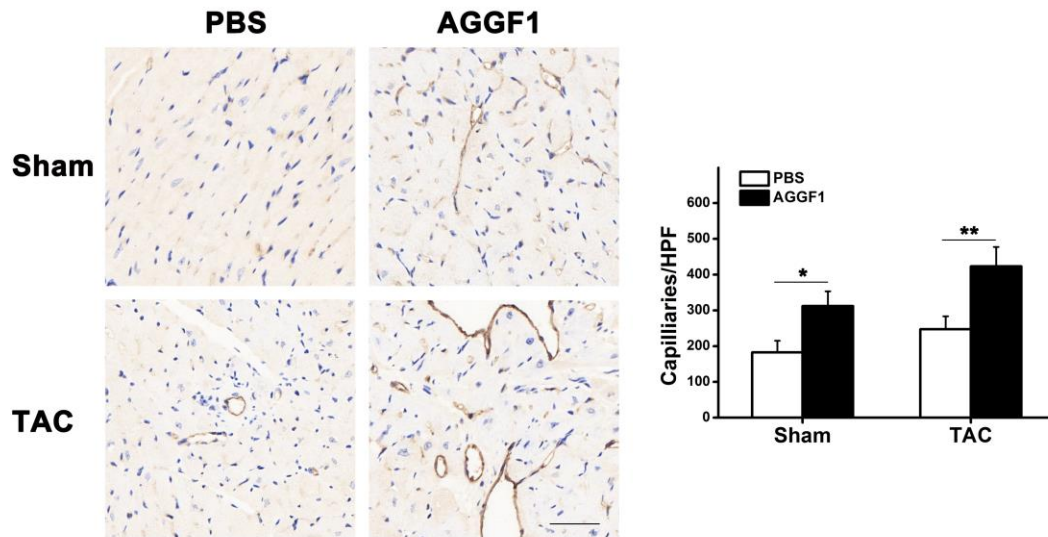

**Supplementary Figure 5 The AGGF1 protein treatment increases the ventricular vascular density as shown by increased CD31-positive vessels in TAC and control sham mice.** Scale bar, 50  $\mu$ m. Data are presented as mean  $\pm$  s.d. from at least three independent experiments (n=8/group, \* $P$ <0.05, \*\* $P$ <0.01). Statistical analysis was carried out by a Student's two-tailed t-test.

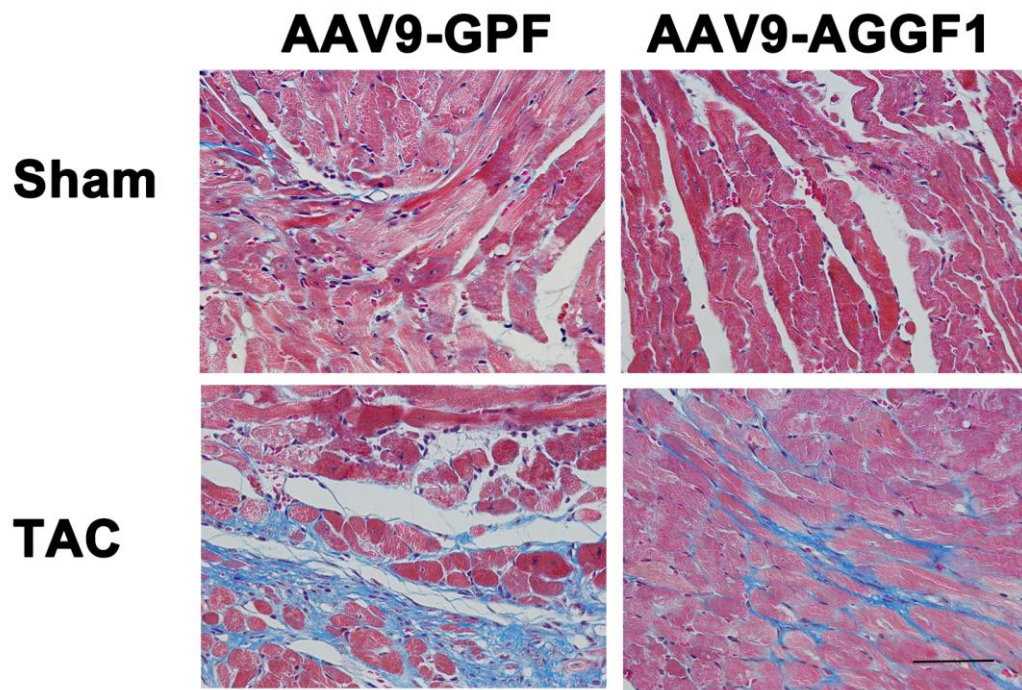

**Supplementary Figure 6 Gene delivery by AAV9-AGGF1 viruses inhibits myocardial fibrosis induced by TAC with Masson trichrome staining. Scale bar, 50  $\mu$ m.**



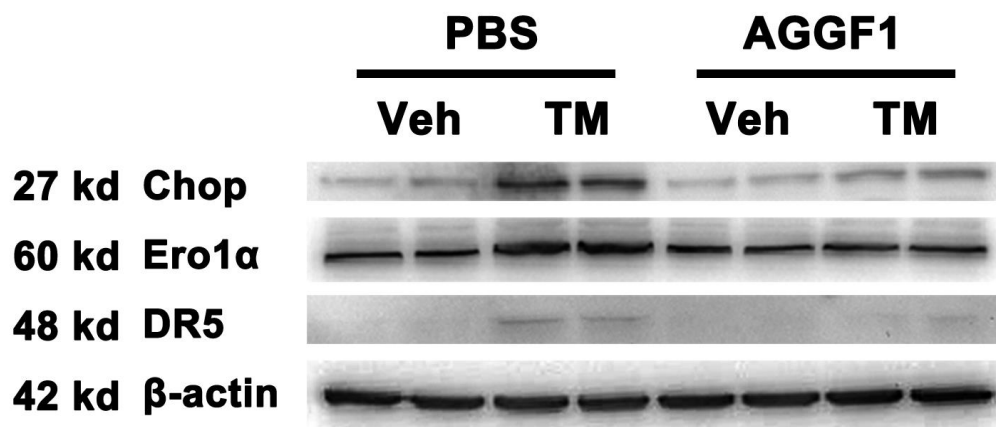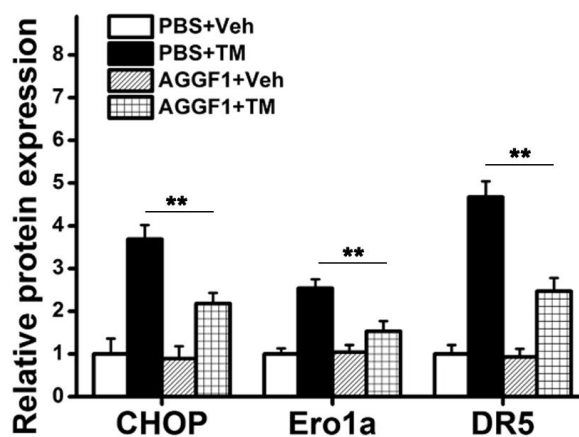

**Supplementary Figure 7** The AGGF1 treatment reduces ER stress activator Tunicamycin (TM)-induced expression of CHOP, Ero1 $\alpha$ , and DR5. Data are presented as mean  $\pm$  s.d. from at least three independent experiments (n=6/group, \*\* $P$ <0.01). Statistical analysis was carried out by a Student's two-tailed t-test.



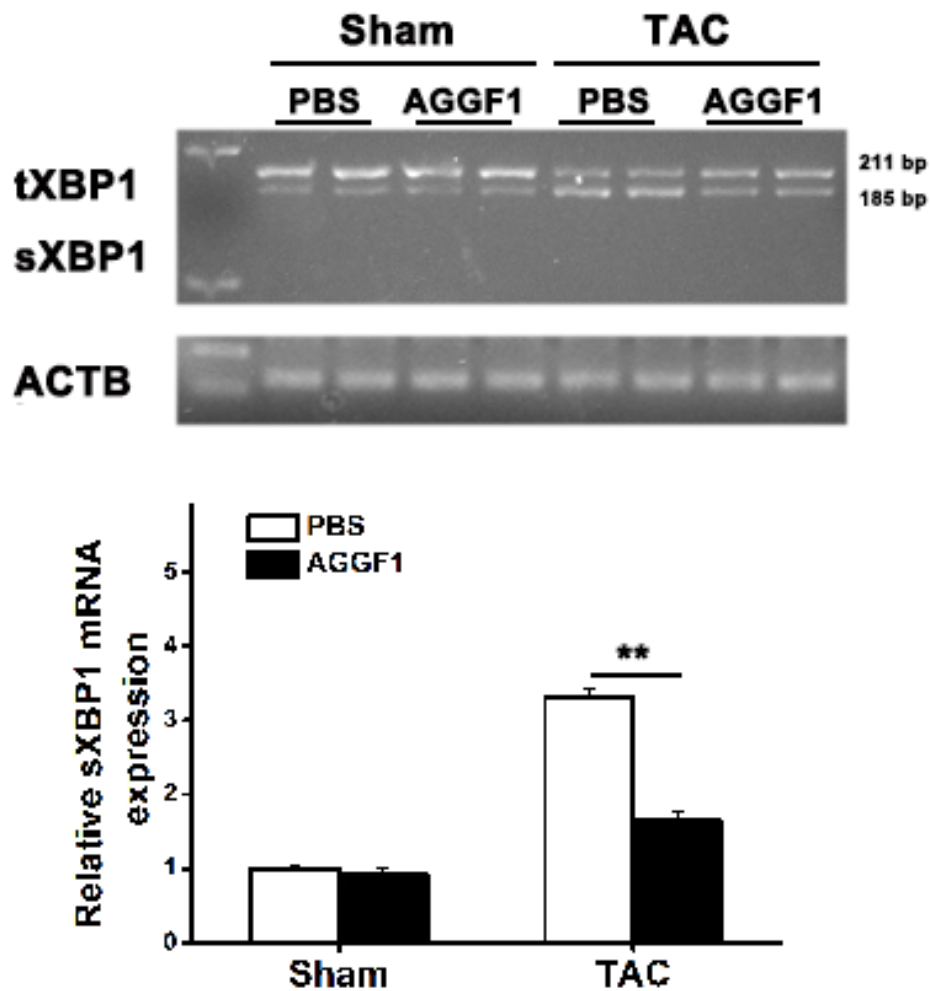

**Supplementary Figure 8 Semi-quantitative RT-PCR analysis to characterize alternative splicing of *XBPI*.** Total RNA samples were isolated from TAC mice or control sham mice treated with AGGF1 (0.25 mg/kg body weight) or control PBS, and reverse-transcribed into cDNA. PCR was then carried out using the cDNA and *XBPI* primers (Supplementary Table 1). The RT-PCR products were then separated by 3% agarose gels. Two PCR bands were detected. The 211 bp and 185 bp bands represent the alternatively spliced *XBPI* transcripts with or without the 26 nt intron 3. The *ACTB* (encoding  $\beta$ -actin) was used as loading control (123 bp). The intensity of the 185 bp spliced *XBPI* transcript (*sXBPI*) over the *ACTB* transcript was quantified and plotted at the bottom. (n=6/group, \*\* $P < 0.01$ ). Data are shown as mean  $\pm$  s.d. from at least three independent experiments. Statistical analysis was carried out by a Student's two-tailed t-test.

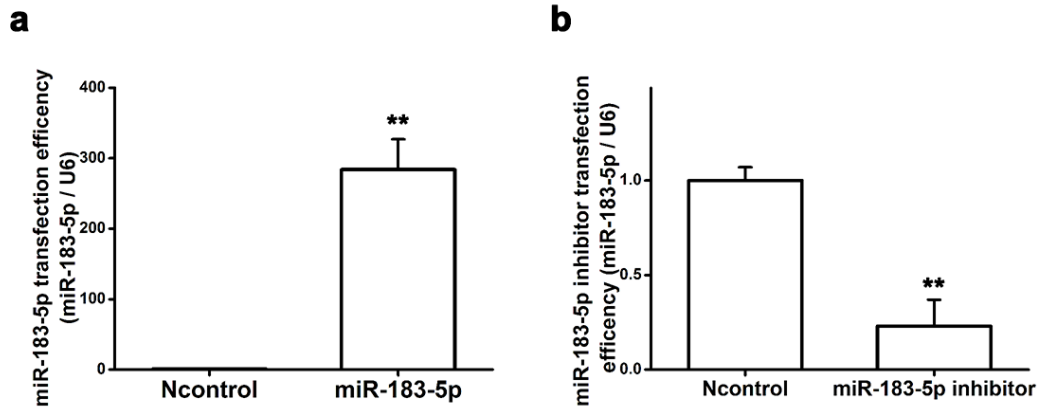

**Supplementary Figure 9 Quantitative qPCR analysis of *miR-183-5p*.**

**(a)** Transfection of the *miR-183-5p* mimics successfully increased the expression level of *miR-183-5p* in H9C2 cells compared with negative control (Ncontrol) (n=3/group, \*\* $P < 0.01$ ).

**(b)** Transfection of the *miR-183-5p* inhibitor successfully reduced the expression level of *miR-183-5p* in H9C2 cells compared with negative control (Ncontrol) (n=3/group, \*\* $P < 0.01$ ).

Data are shown as mean  $\pm$  s.d. from at least three independent experiments. Statistical analysis was carried out by a Student's two-tailed t-test.

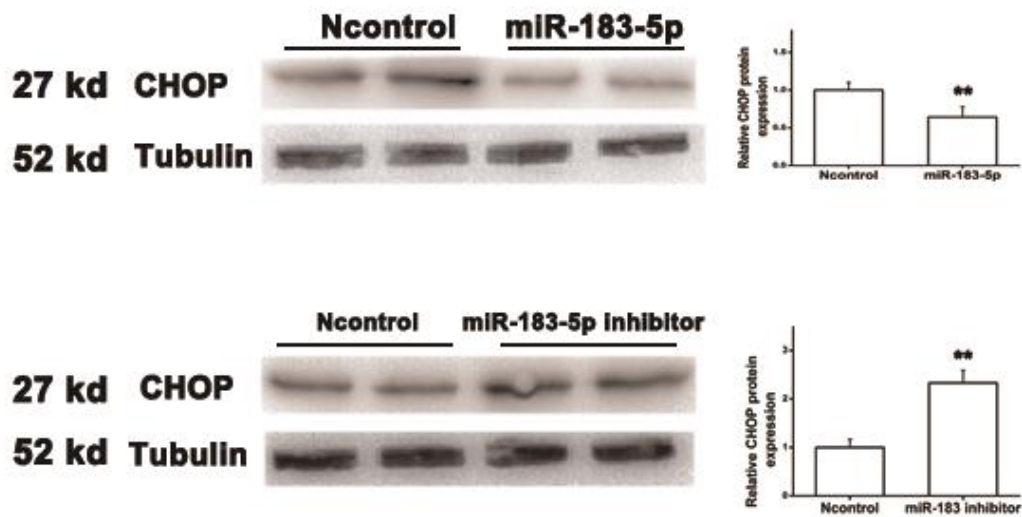

**Supplementary Figure 10** Western blot analysis for CHOP expression in the hearts from TAC mice injected with Ago-miR-183-5p vs. Ago-miR-NC or Antago-miR-183-5p vs. Antago-miR-NC. Data are shown as mean  $\pm$  s.d. from at least three independent experiments (n=6/group, \*\* $P$ <0.01). Statistical analysis was carried out by a Student's two-tailed t-test.

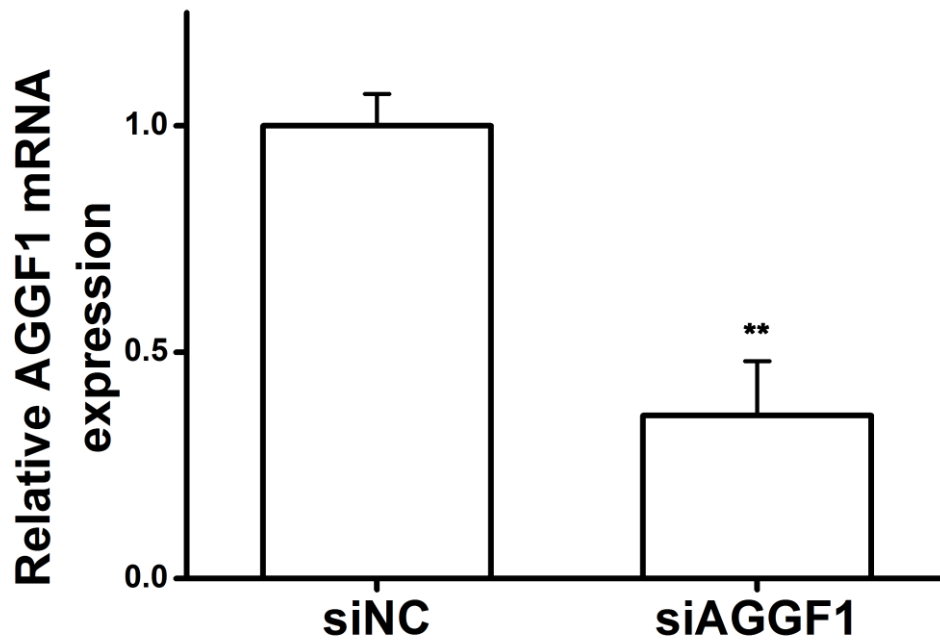

**Supplementary Fig. 11 Real-time RT-PCR analysis for *AGGF1* expression in H9C2 cells by *AGGF1* siRNA (siAGGF1) vs. negative control scramble siRNA (siNC). Data are presented as mean  $\pm$  s.d. from at least three independent experiments (n=3/group, \*\* $P$ <0.01). Statistical analysis was carried out by a Student's two-tailed t-test.**

**a**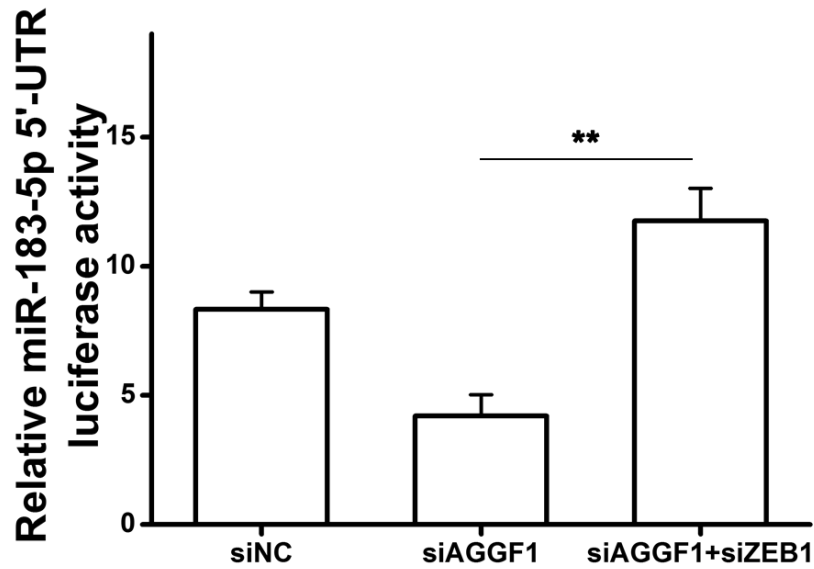**b**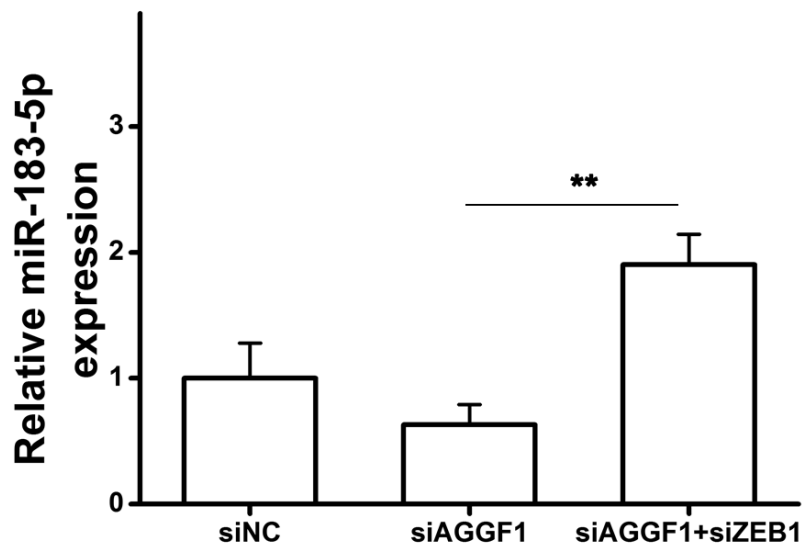

**Supplementary Fig 12 *AGGF1* acts upstream of *ZEB1* in the regulation of *miR-183-5p* expression.**

(a) Relative *miR-183-5p* promoter luciferase activity in H9C2 cells after siAGGF1 with or without siZEB1 (n=3/group, \*\* $P < 0.01$ ).

(b) Real-time RT-PCR analysis for *miR-183-5p* expression in H9C2 cells after siAGGF1 with or without siZEB1. (n=3/group, \*\* $P < 0.01$ ).

Data are shown as mean  $\pm$  s.d. from at least three independent experiments. Statistical analysis was carried out by a Student's two-tailed t-test.

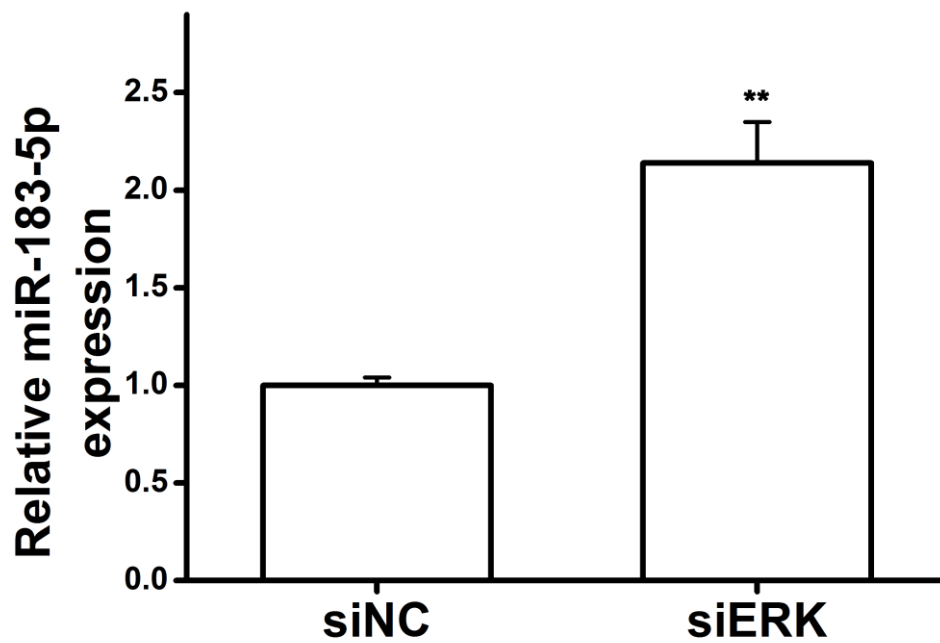

**Supplementary Fig 13 Real-time RT-PCR analysis for *miR-183-5p* expression levels in H9C2 cells transfected with ERK specific siRNA (siERK) or control siRNA (siNC).**

Data are shown as mean  $\pm$  s.d. from at least three independent experiments (n=3/group, \*\* $P$ <0.01). Statistical analysis was carried out by a Student's two-tailed t-test.

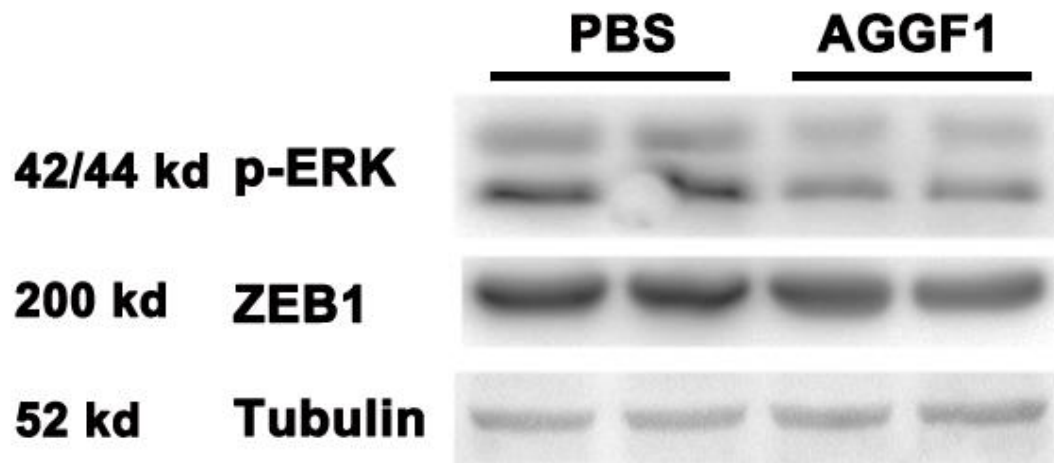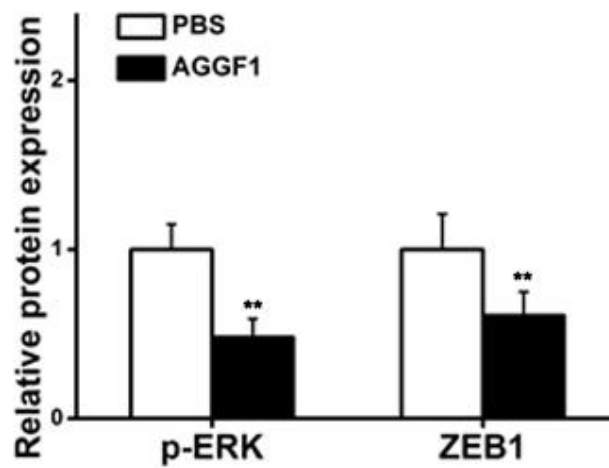

**Supplementary Fig 14** Western blot analysis for the activation of ERK1/2 and ZEB1 expression in H9C2 cells treated with ISO with or without AGGF1 for 48 h. Data are shown as mean  $\pm$  s.d. from at least three independent experiments ( $n=6/\text{group}$ , **\*\* $P<0.01$** ). Statistical analysis was carried out by a Student's two-tailed t-test.



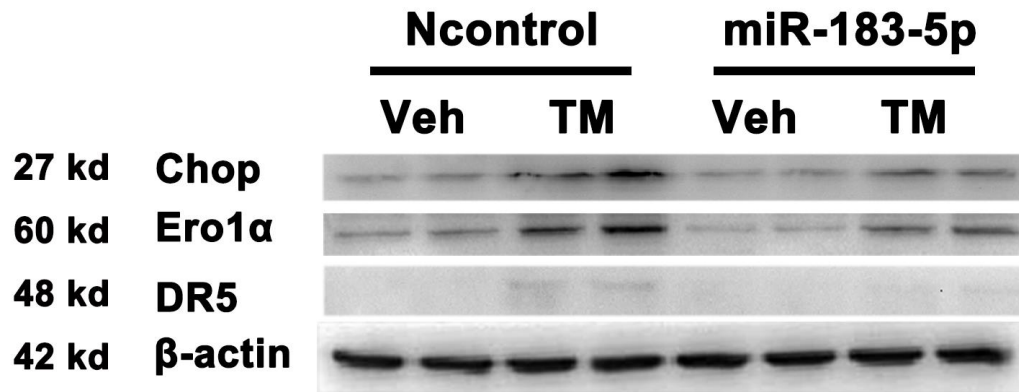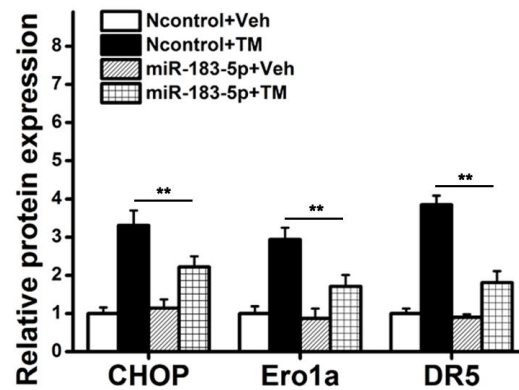

**Supplementary Figure 15** *MiR-183-5p* mimics reduces ER stress activator Tunicamycin (TM)-induced expression of CHOP, Ero1 $\alpha$ , and DR5. Data are shown as mean  $\pm$  s.d. from at least three independent experiments ( $n=6$ /group,  $**P < 0.01$ ). Statistical analysis was carried out by a Student's two-tailed t-test.

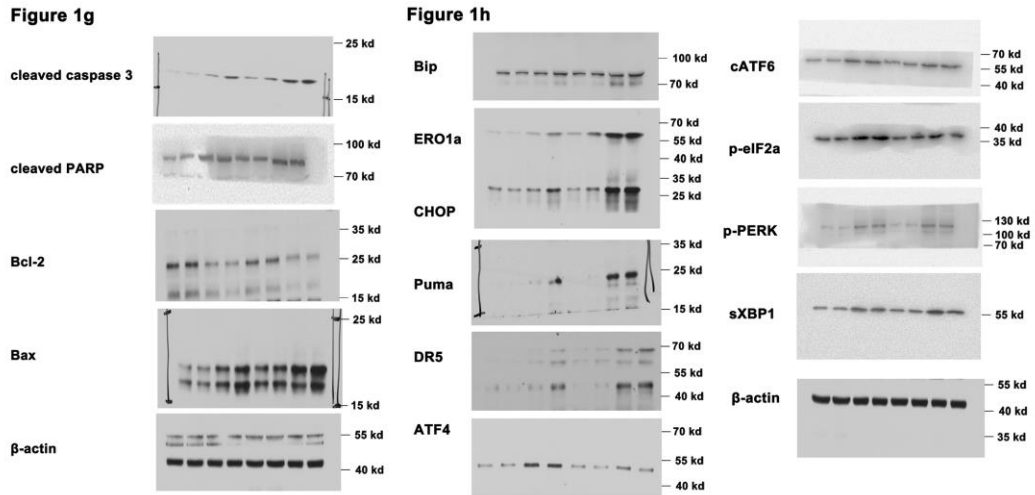

Supplementary Figure 16 Original Western blot images for Figure 1g and 1h.

**Figure 2b**

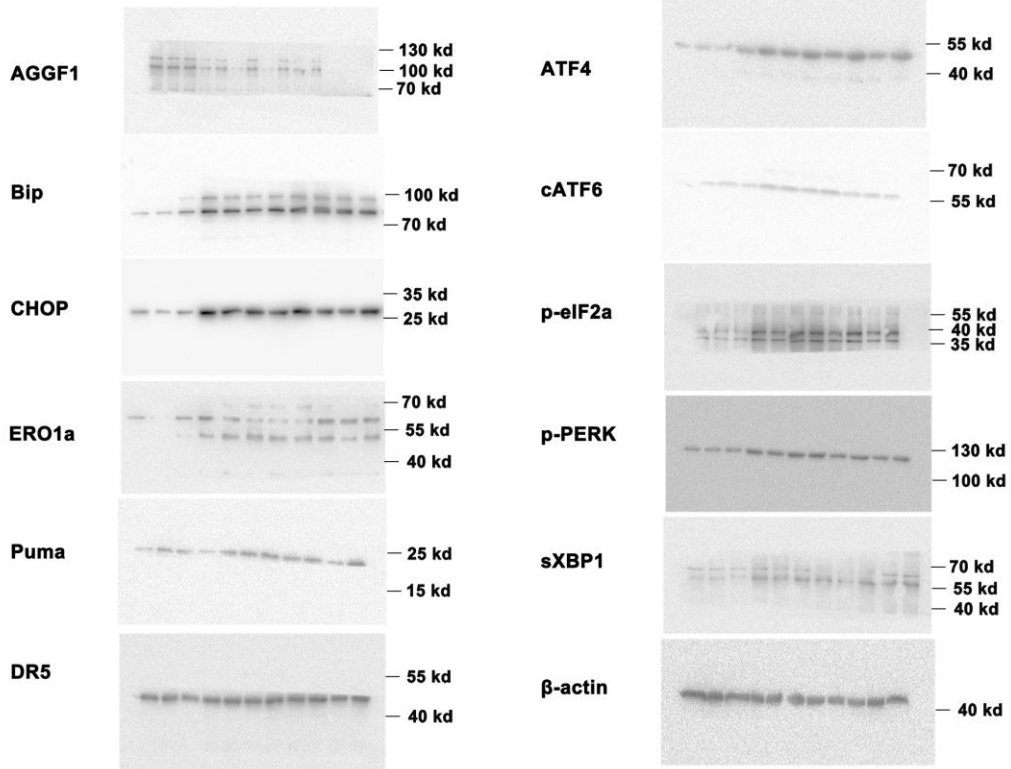

**Figure 2e**

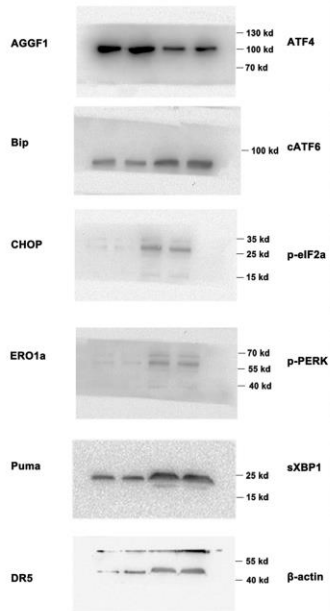

**Figure 2g**

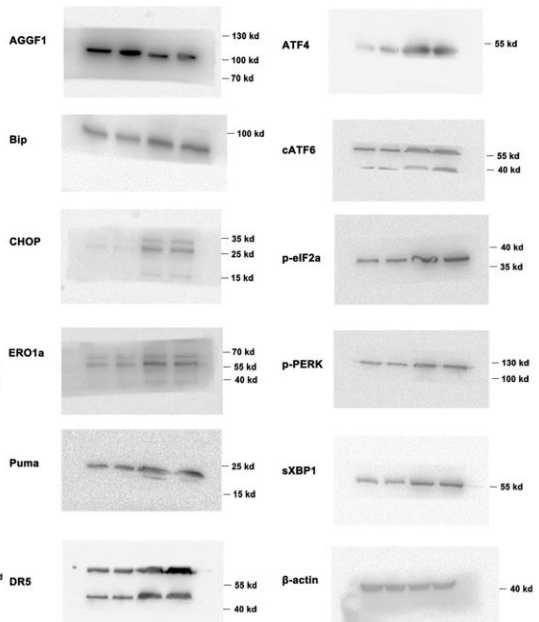

**Supplementary Figure 17 Original Western blot images for Figures 4a, 4d, 4f and 5e.**

Figure 4a

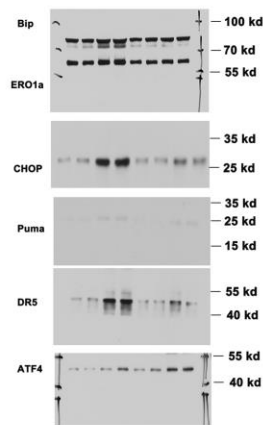

Figure 4d

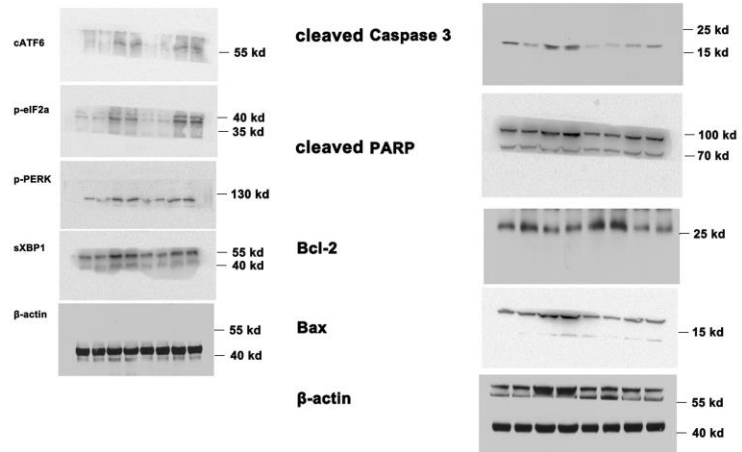

Figure 4f

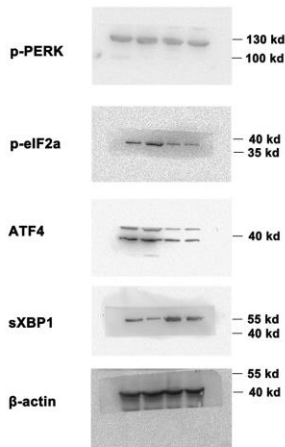

Figure 5e

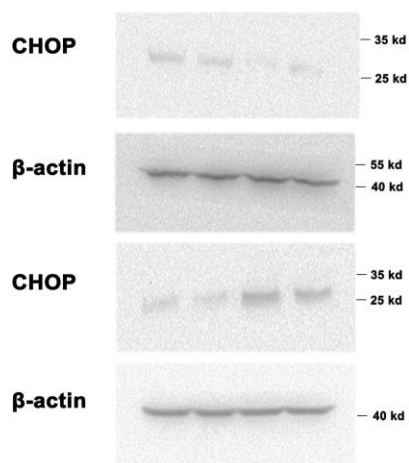

Supplementary Figure 18 Original Western blot images for Figures 4a, 4d, 4f and 5e.

Figure 6e

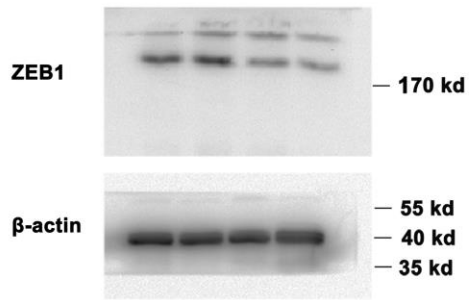

Figure 6f

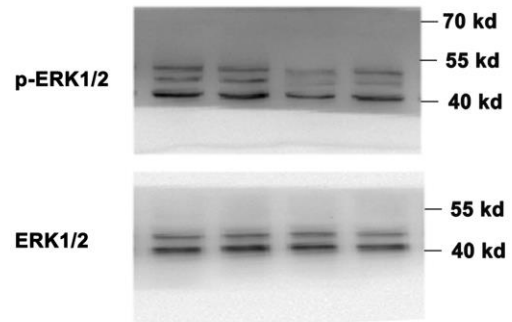

Figure 6h

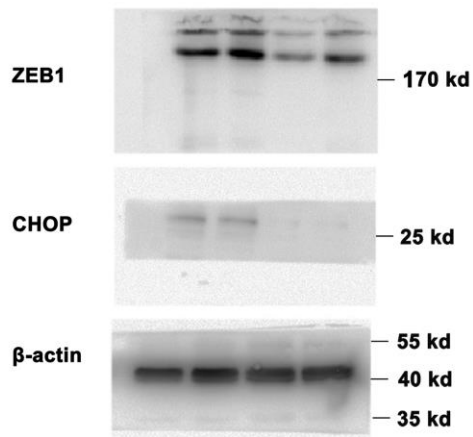

Figure 7a

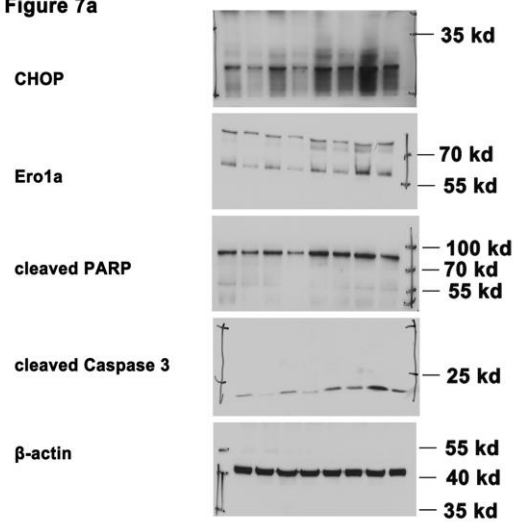

**Supplementary Figure 19 Original Western blot images for Figures 6e, 6f, 6h and 7a.**

**Supplementary Figure 7**

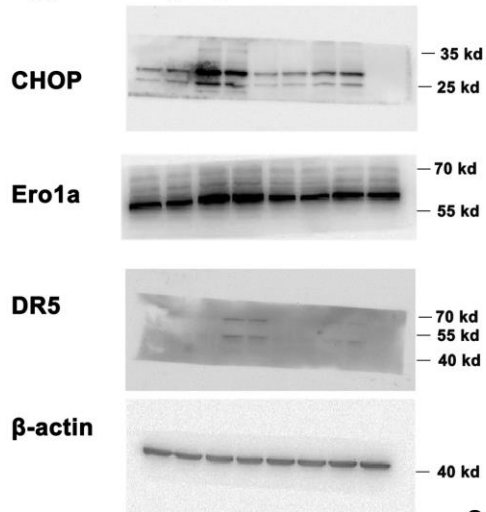

**Supplementary Figure 10**

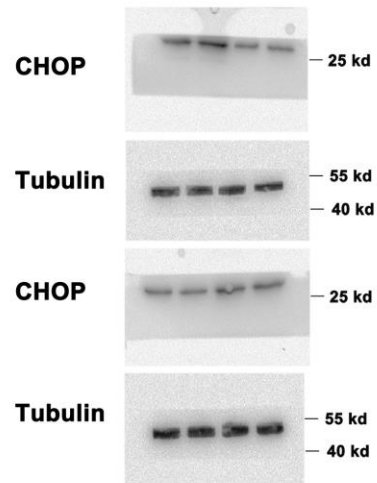

**Supplementary Figure 15**

**Supplementary Fig 14**

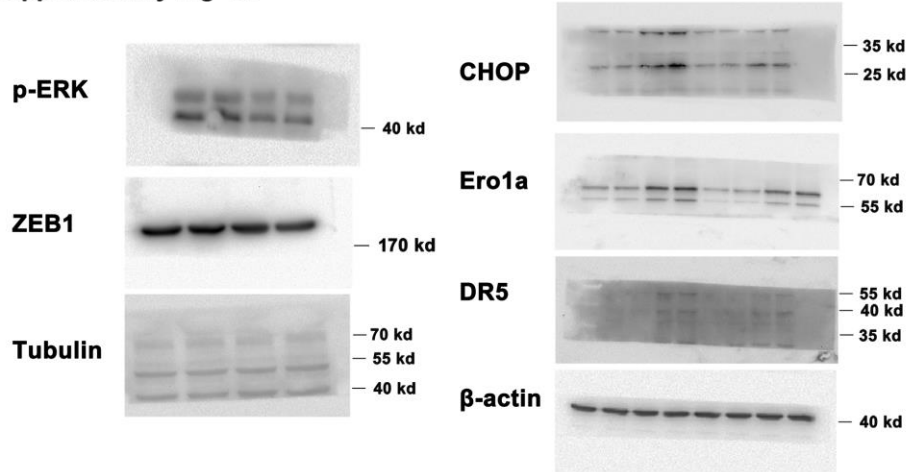

**Supplementary Figure 20** Original Western blot images for Figures 7, 10, 14 and 15.

**Supplementary Table 1 Sequences of primers used for Real-time RT-PCR analysis.**

---

| <b>Gene</b>          | <b>Sequence</b>                                         |
|----------------------|---------------------------------------------------------|
| <i>Aggf1</i>         | F: CAAGCTCCTTGGGCGATTTCA<br>R: GCATAACTCCCGCTGTCTATGT   |
| <b><i>ACTB</i></b>   | F: TTGCACATGCCGGAGCCGTT<br>R: CACATGCCGGAGCCGTTGTA      |
| <i>ATF4</i>          | F: CCTGAACAGCGAAGTGTTGG<br>R: TGGAGAACCCATGAGGTTTCAA    |
| <i>CHOP</i>          | F: CTCGCTCTCCAGATTCCAGTC<br>R: CTTTCATGCGTTGCTTCCCA     |
| <i>ERo1</i> $\alpha$ | F: GTTAGTGGTTACCTGGACGACT<br>R: CAGAATACTTGTAGCTCGCAGAC |
| <i>Xbp1</i>          | F: CCTTGTGGTTGAGAACCAGG<br>R: GTGTCAGAGTCCATGGGA        |

---
